# Supplementary material for: In Silico Design of Peptide-Based SARS-CoV-2 Fusion Inhibitors That Target WT and Mutant Versions of SARS-CoV-2 HR1 Domains
Source: MDPI journal article supplement (doi:10.3390/biophysica1030023), 2021-07-08
Supplement: s1 [file s1]

# Supplementary Information

**Supplementary Table S1.** Residue variability of WT HR1 domain of SARS-CoV-2.

| Residue | Variability                                 |
|---------|---------------------------------------------|
| N914    | K, N, A, D, T, Q, S                         |
| Y917    | N, I, V, Y, T, Q, L, M, S, F                |
| E918    | R, Q, D, E, N, K                            |
| L922    | T, L, Q, E, M, K, I                         |
| N925    | D, A, K, N, E, Q, T, S                      |
| S929    | S, E, Q, T, H, R, A, D, K, N                |
| I931    | I, V, T, L, P, M, F                         |
| G932    | Q, M, S, K, A, D, R, H, T, E, L, N, V, Y, G |
| K933    | Q, E, T, F, S, R, D, A, K, N, G, Y, H       |
| D936    | T, Q, E, M, S, F, N, K, R, A, D, V, H, G    |
| S939    | G, H, R, D, A, N, K, M, S, L, W, E, Q, T    |
| S943    | E, L, T, G, V, N, I, M, S, Q, H, D, A, R, K |
| G946    | E, Q, T, S, A, D, R, K, N, G, V, H          |
| D950    | G, N, K, D, A, S, T, E, L                   |
| Q954    | S, E, Q, L, T, G, H, D, A, R, K, N          |
| Q957    | T, E, L, N, I, V, Y, G, Q, M, S, K, D, A, H |
| N960    | H, I, N, A, S, T, E, Q                      |
| T961    | H, V, Y, N, K, A, D, S, T, Q, E             |
| K964    | V, G, N, T, E, P, L, H, K, D, A, R, M, S, Q |
| S975    | A, T, N, Y, H, S                            |
| N978    | A, D, R, N, K, G, V, E, Q, L, T, S          |
| S982    | M, S, Q, H, K, D, A, R, T, E, L, V, Y, G, N |
| K986    | L, E, Q, T, S, M, R, D, A, K, I, N, G, V    |
| V987    | L, I, G, V                                  |
| E988    | N, D, A, G, T, E, Q, S                      |

**Supplementary Table S2.** Sequences selected by CONSURF for conservation analysis of SARS-CoV-2 HR1 domain

| Sequence | >Input_pdb_SEQRES_A                                                                                                                                                                                   |
|----------|-------------------------------------------------------------------------------------------------------------------------------------------------------------------------------------------------------|
| 1        | GVTQNVLYENQKLIANQF-----NSAIGKIQDSLSTASALGKLQDVVNQN<br>AQALNTLVKQLSSNFGA-----ISSVLNDILSRDKVESG<br>GR-----GGPDVDLGDISGINASVVNIQKEIDRLNEVAKNLNESLIDLQELGKY<br>GG                                         |
| 2        | >UniRef90_UPI0000518FE8_10_148<br>GVTQNVLYENQKLIANQF-----NKAISQIQESLTTTSTALGKLQDVVNQN<br>AQALNTLVKQLSSNFGA-----ISSVLNDILSRDKVEAE<br>VQ--IDRLITGGRGSDVDLGDISGINASVVNIQKEIDRLNEVAKNLNESLIDLQELGKY<br>-- |
| 3        | >UniRef90_UPI0015516385_2_114<br>AQALNTLVKQLLVPRGSGGSGGSGGLEVLFGQPDVDLGDISGINASVVNIQKEIDRLNEV<br>AK-----NLNESLIDLQELH--<br>--                                                                         |
| 4        | >UniRef90_A0A6M4NHL5_910_989<br>GVTQNVLYEXXKLIANQF-----NSAIGKIQDSLSTASALGKLQDVVNQN<br>AQALNTLVKQLSSNFGA-----ISXVLNDXLSRLDKVEA-<br>-----<br>--                                                         |

|    |                                                                                                                                                                                                     |
|----|-----------------------------------------------------------------------------------------------------------------------------------------------------------------------------------------------------|
| 5  | >UniRef90_A0A7D7XM23_910_989<br>GVTQNVLYENQKLIANQF-----NSAIGKIQDSLSTASALGKLQDVVNQN<br>AQALNTLVKQLSSNFGA-----ISSVLNXXXSRLDKVEA-<br>-----<br>--                                                       |
| 6  | >UniRef90_A0A6M8F9N1_745_824<br>GVTQNVLYENQKLIAXQX-----NSAIXKIQXSLSXTASALGKLQDVVNQN<br>AQALNTLVKQLSSNFGA-----ISSVLNDILSRLDKVEA-<br>-----<br>--                                                      |
| 7  | >UniRef90_A0A7D5SIA1_848_927<br>GVTQNVLYENQKLIANQF-----NSAIGKIQDSLSTASALGKLQDVVNQN<br>AQALNXXXXXXXXSNFGA-----ISSVLNDILSRLDKVEA-<br>-----<br>--                                                      |
| 8  | >UniRef90_A0A6N1WNH7_910_989<br>GVTQXVLYENQKLIANQF-----NSAXXXXXSLSTASALGKLQDVVNQN<br>AQALNTLVKQLSSNFGA-----ISSVLNDILSRLDKVEA-<br>-----<br>--                                                        |
| 9  | >UniRef90_A0A3Q8AKM0_895_974<br>GVTQNVLYENQKQIANQF-----NNAISKIQDSLTTTSAALGKLQDVINQN<br>AVALNTLVKQLSSNFGA-----ISSVLNDILSRLDKVEA-<br>-----<br>--                                                      |
| 10 | >UniRef90_E0XIZ3_896_975<br>GVTQNVLYENQKQIANQF-----NKAISQIQDSLSTTTTALGKLQDVINQN<br>AIALNTLVKQLSSNFGA-----ISSVLNDILSRLDKVEA-<br>-----<br>--                                                          |
| 11 | >UniRef90_A0A7D4CY46_910_989<br>GVTQNVLYENQKLIANQF-----NSAIGKIQDSLSTXXXXXXXXXDVVNQN<br>AQALNTLVKQLSSNFGA-----ISSVLNDILSRLDKVEA-<br>-----<br>--                                                      |
| 12 | >UniRef90_UPI0003F054F4_2_130<br>GITQQVLSSENQKLIANKF-----NQALGAMQTGFTTTNEAFQKVQDAVNNN<br>AQALSKLASELSNTFGA-----ISASIGDIIQRLDVLEQS<br>GG--RGSIP-----NFGSLTQINTTLLDLTYEMLSLQQVVKALNESYIDLKELG--<br>-- |
| 13 | >UniRef90_A0A7D3YGL0_910_989<br>GVTQNVLYENQKLIANQF-----NSAIGKIQDSLSTASAXXXXXXXXXXXXX<br>XXALNTLVKQLSSNFGA-----ISSVLNDILSRLDKVEA-<br>-----<br>--                                                     |
| 14 | >UniRef90_A0A6N1WBE0_910_989<br>GVTQNVLYENQKLIANQF-----NSAIGKIQSXXXXXXXXXXXXXXXXVVNQN<br>AQALNTLVKQLSSNFGA-----ISSVLNDILSRLDKVEA-<br>-----<br>--                                                    |
| 15 | >UniRef90_A0A7D4D1T0_910_989<br>GVTQNVLYEXXXXXXXXXX-----XXXXXXXXXSLSSTASALGKLQDVVNQN<br>AQALNTLVKQLSSNFGA-----ISSVLNDILSRLDKVEA-<br>-----<br>--                                                     |
| 16 | >UniRef90_A0A7D5NRL0_852_931<br>GVTQNVLYENQKLIANQF-----NSAIGKIQDSLSTASALGKLQDVVNQN<br>AQALNXXXXXXXXXXGA-----ISXXXXXXXXXXDKVEA-<br>-----                                                             |

|    |                                                                                                                                                                             |
|----|-----------------------------------------------------------------------------------------------------------------------------------------------------------------------------|
|    | -----<br>--                                                                                                                                                                 |
| 17 | >UniRef90_UPI0003AFF9F2_2_122<br>AQALSKLASELSNTFGA-----ISASIGDILVPRGSGGSG<br>GSGGLEVLFG-----GPLTQINTTLLDLTYEMLSLQQVVKALNESYIDLKELL--<br>--                                  |
| 18 | >UniRef90_UPI000BBD49D7_265_361<br>GVTMNVLSNQKMIASAF-----NNALGAIQDGF DATNSALGKIQSVVNAN<br>AEALNNLLNQLSNRFGA-----ISASLQEILTRLEAVEAK<br>AQ--IDRLIN-----GRLTALNA-----<br>--    |
| 19 | >UniRef90_A0A6N0VQNQ5_870_949<br>GVTQNVLYENQKLIANQF-----NSAIGKIXXXXXXXXXXXXXXXXXXNQQ<br>XXXXNXXVKQLSSNFGA-----ISSVLNDILSRDKVEA-<br>-----<br>--                              |
| 20 | >UniRef90_V5N6L2_552_650<br>GVTMNVLSNQKMIASSF-----NNAIGAIQEGF DATNSALAKIQSVVNAN<br>AEALNNLLNQLSNRFGA-----ISASLQEILSRDLDALEAQ<br>AQ--IDRLIN-----GRLTALNAYV-----<br>--        |
| 21 | >UniRef90_F1BYL9_934_1013<br>AAALNTLVTQLGNNFGA-----ISSAINDITQRLDKLEAA<br>-----<br>--                                                                                        |
| 22 | >UniRef90_A0A088DJY6_954_1033<br>AQALNNLVAQLTNNFGA-----ISSAINDITQRLDKLEAD<br>-----<br>--                                                                                    |
| 23 | >UniRef90_A0A2H4MXF2_983_1082<br>GVTMDVLTQNQKMIANAF-----NNALGAIQDGF DATNSALAKIQSVVNAN<br>AEALNNLLQLTNRFGA-----ISSSLQEILSR LDSLEAQ<br>VQ--IDRLIN-----GRLTALNAYVA-----<br>--  |
| 24 | >UniRef90_A0A2H4MZ26_1011_1109<br>GVTMDVLSQNQKMIANAF-----NNALGAIQDGF DATNSALAKIQAVVNAN<br>AEALNNLLGQLSNRFGA-----ISSSLQEILSRDLDALEAQ<br>VQ--IDRLIN-----GRLTALNAYV-----<br>-- |
| 25 | >UniRef90_A0A2H4MXV6_1000_1082<br>GVTMDVLSNQKMIANAF-----NNALGAIQDGF DATNSALVKIQAVVNAN<br>AEALNNLLQQLSNRFGA-----ISASLQEILSRDLTLEAQ<br>VQ-----<br>--                          |
| 26 | >UniRef90_A0A096XNG8_988_1070<br>GVTMDVLSNQKLIANAF-----NNALGAIQNGF DATNSALAKIQNVVNAN<br>AEALNNLLQLSNRFGA-----ISASLQEILSRDLDALEAQ<br>VQ-----<br>--                           |
| 27 | >UniRef90_A0A6M8F741_910_989<br>GVTQNVLYENQXXXXXX-----XXXXXXXXXXXXXXXXXKLQDVVNQN<br>AQALNTLVKQLSSNFGA-----ISSVLNDILSRDKVEA-<br>-----<br>--                                  |
| 28 | >UniRef90_A0A6G9ZXM6_910_989<br>GVTQNVLYENQKLIANQF-----NXXXXXXXXXXXXXXXXXXXXXXXXXNQQ<br>XXALNTLVKQLSSNFGA-----ISSVLNDILSRDKVEA-                                             |

|    |                                                                                                                                                                          |
|----|--------------------------------------------------------------------------------------------------------------------------------------------------------------------------|
|    | -----<br>--                                                                                                                                                              |
| 29 | >UniRef90_A0A1B3Q5W5_924_1005<br>GVTTNVLMENQKLIANAF-----NNALTGIQKGFDATNMALAKMQSVINQH<br>AQQSLSTLVDQLGNSFGA-----ISSSINEIFSRLDELEAN<br>A-----<br>--                        |
| 30 | >UniRef90_A0A096XNH1_1001_1099<br>GVTMNVLSNQKMIASAF-----NTALGAIQNGFDATNSVLAKIQSVVNEN<br>VDALNNLLQQLSNRFGA-----ISASLQEILSRLDALEAQ<br>AQ--IDRLIN-----GRLTALNAYV-----<br>-- |
| 31 | >UniRef90_A0A0A7UZR7_997_1079<br>GVTMDVNLQNQKMIANAF-----NNALTAIQNGFDATNSALAKIQSVVNAN<br>AEALNNLLQQLSNRFGA-----ISSSLQEILSRLDALEAQ<br>VQ-----<br>--                        |
| 32 | >UniRef90_Q0ZME7_991_1073<br>GVTMDVNLKNQKLIANAF-----NKALLSIQNGFTATNSALAKIQSVVNAN<br>AQALNSLLQQLFNKFGA-----ISSSLQEILSRLDNLEAQ<br>VQ-----<br>--                            |
| 33 | >UniRef90_A0A411D588_459_555<br>GVTMDVLSQNQKLISNAF-----NNALDAIQEGFDATNSALVKIQSVVNAN<br>AEALNNLLQQLSNRFGA-----ISASLQEILSRLDALEAQ<br>AQ--IDRLIN-----GRLTALNA-----<br>--    |
| 34 | >UniRef90_A0A5Q0TVR1_964_1044<br>GITQNVLMENQKLIANKF-----NQALGAMQTGFTTTNQAFQKVQDAVNAN<br>AQALSKLASELSNTFGA-----ISASIGDILKRLDTLEQE<br>-----<br>--                          |
| 35 | >UniRef90_UPI001084956B_29_133<br>GNSLNHLTSQLRQNFQA-----ISSSIQAIYDRLDTIQSG<br>GRG-----GSLDQINVTFLDLEYEMKKLEEAIKKLEESYIDLKELG--<br>--                                     |
| 36 | >UniRef90_Q0Q4F2_981_1077<br>GITQQVLSNQKLIANKF-----NQALGAMQTGFTTSNLAFSKVQDAVNAN<br>AQALSKLASELSNTFGA-----ISSSIDILARLDTVEQD<br>AQ--IDRLIN-----GRLTSLNA-----<br>--         |
| 37 | >UniRef90_A0A6M3YVS3_910_989<br>GVTQNVLYENQKLIANQF-----NSAIGKIQDLSSTASALGKLQDXXXXX<br>XXXXXXXXXXXXXXXXXXXX-----XXXXXXDILSRLDKVEA-<br>-----<br>--                         |
| 38 | >UniRef90_Q5MQD0_995_1076<br>GVTMDVNLKNQKLIATAF-----NNALLSIQNGFSATNSALAKIQSVVNSN<br>AQALNSLLQQLFNKFGA-----ISSSLQEILSRLDALEAQ<br>V-----<br>--                             |
| 39 | >UniRef90_A0A023Y9K3_951_1049<br>GITQQVLSNQKQIANKF-----NQALGAMQTGFTTTNLAFSKVQDAVNAN<br>AQALSKLASELSNTFGA-----ISSSIDILKRLDAVEQE<br>AQ--IDRLIN-----GRLTSLNAFV-----<br>--   |

|    |                                                                                                                                                                     |
|----|---------------------------------------------------------------------------------------------------------------------------------------------------------------------|
| 40 | >UniRef90_A3EXD0_981_1079<br>GITQQVLSSENQKIIANKF-----NQALGAMQTGFTTTNLAFNKVQDAVNAN<br>AMALSKLAAELSNFTGA-----ISSISDILARLDTVEQE<br>AQ-IDRLIN-----GRLTSLNAFV-----<br>-- |
| 41 | >UniRef90_K9N5Q8_984_1067<br>GITQQVLSSENQKLIANKF-----NQALGAMQTGFTTTNEAFHKVQDAVNNN<br>AQALSKLASELSNFTGA-----ISASIGDIIQRLDVLEQD<br>AQ-I-----<br>--                    |
| 42 | >UniRef90_A3EXH4_910_991<br>GVTTQVLVENQQLIANSF-----NKALVSIQQGFDATNEALSKMQSVINQH<br>AQQQLQTLVSQLGNSFGA-----ISSSINEIFSRLDGLEAN<br>A-----<br>--                        |
| 43 | >UniRef90_F1DAZ1_898_980<br>GVTTNVLMENQKLIANAF-----NKALVSIQTGFEATNQALNKIQTVVNHN<br>ALQLQALVQQLGNTFGA-----ISSSVNEIFSRLDQLEAN<br>AE-----<br>--                        |
| 44 | >UniRef90_G5CJB9_1002_1085<br>GVSM DVLSQNQKLIANAF-----NNALHAIQQGFDATNSALVKIQAVVNAN<br>AEALNNLLQQLSNRFGA-----ISASLQEILSRLDALEAE<br>AQ-I-----<br>--                   |
| 45 | >UniRef90_E0ZN52_904_985<br>GVTTQVLVENQKLIANSF-----NNALTNIQKGFDATNEALSKMQLVINQH<br>AQQQLQTLVNQLGNSFGA-----ISASINEIFSRLDGLEAD<br>A-----<br>--                        |
| 46 | >UniRef90_U5LNM4_965_1046<br>GITQNVLMKNQREIANKF-----NQALGAMQTGFTATNQAFQKVQDVVNAN<br>AQALSKLASELANFTGA-----ISSSIGDILKRLDVLEQE<br>V-----<br>--                        |
| 47 | >UniRef90_U5NJG5_975_1055<br>GITQQVLSSENQKIIANKF-----NQALGAMQTGFTTTNEAFQKVQDAVNTN<br>AQALAKLASELSNFTGA-----ISSSIGDIIQRLDVLEQE<br>-----<br>--                        |
| 48 | >UniRef90_A0A6M3U134_910_989<br>GVTQNVLYENQKLIANQF-----NSAIGKIQDSLSTAXXXXXXXXXXXXXX<br>XXXXXXXXXXXXXXXXXA-----ISSVLNDILSRLDKVEA-<br>-----<br>--                     |
| 49 | >UniRef90_A3EXG6_907_986<br>GVTTQVLVENQKLIASSF-----NNALVNIQKGFTETSIALSKMQDVINQH<br>AAQLHTLVVQLGNSFGA-----ISSSINEIFSRLLEGLAA-<br>-----<br>--                         |
| 50 | >UniRef90_A0A2Z4EVN5_907_988<br>GVTTNVLMENQQLIANAF-----NKALVSIQEGFTATNQALNKIQTVVNNN<br>ALQLQVLVQQLGNTFGA-----ISASVNEIFSRLDLLEAN<br>A-----<br>--                     |
| 51 | >UniRef90_A0A6H0C7Y4_910_989<br>GVTQNVLYXXXXXXXXXQF-----NXXXXXXXXXXXXXXXXXXXXXDVVNQN<br>AQALNTLVKQXXSNFGA-----ISSVLNDILSRLDKVEA-<br>                                |

|    |                                                                                                                                                                                 |
|----|---------------------------------------------------------------------------------------------------------------------------------------------------------------------------------|
|    | -----<br>--                                                                                                                                                                     |
| 52 | >UniRef90_A0A5B9Y142_909_990<br>GVTTQVLVQNQQLIANSF-----NNALTNIQKGF DATNLALSQMQSVINQH<br>AQQQLQTLVNQLGNSFGA-----ISSSINEIFSRLDGLEAN<br>A-----<br>--                               |
| 53 | >UniRef90_A0A2R4KP86_985_1083<br>GITQQVLS ENQKQIANKF-----NQAPGAMQTGFTTTNLAFSKVQEAVNAN<br>AKALSKLASELSNTFGA-----ISSISDILQRLDTVEQE<br>AQ-IDRLIN-----GRLTSLNAFV-----<br>--         |
| 54 | >UniRef90_L7UP84_967_1049<br>GITQQVLLENQKQIANKF-----NKALEAMQAGFDATNSALS KVQTAVNNN<br>AMALNKLTQE LSNTFGA-----ISASIADILKRLDTLEQD<br>SQ-----<br>--                                 |
| 55 | >UniRef90_A3EXJ0_907_988<br>GVTTQVLVDNQKLIASSF-----NNALN QIQKGF DATNSALSKIQAVINQH<br>ATQLQTLVLQLGNTFGA-----ISSSINIIFSRLGLEAD<br>A-----<br>--                                    |
| 56 | >UniRef90_A0A7D7Q1Q8_910_989<br>GVTQNVLYENQKLIANQF-----NSAIGKIQDSLSTASALGKLXXVXXXX<br>XXXXXXXXXXXXXXXXXXXX-----XXXXXXXXX SRLDKVEA-<br>-----<br>--                               |
| 57 | >UniRef90_A0A2H4I7G0_776_880<br>GITQTVLQKNQE QIAKSF-----N RAMTHMQDGFRATSSALREIQDVVNKH<br>SEVINQAMSSLNKNFGA-----ITSVIQDIYNRLDII EAN<br>AQ--VDRLIS-----GRLSSLVLAAAKQAE-----<br>-- |
| 58 | >UniRef90_A0A6N1WY71_910_989<br>GVTQNVLYENQKLIAXXX-----XXXXXXXXXXXXXXXXXXXXXXXXXXXXXQX<br>XXALNTLVKQLSSNFGA-----ISSVLNDILSRLDKVEA-<br>-----<br>--                               |
| 59 | >UniRef90_P05135_784_880<br>GITQSLLFKNQEKIAASF-----NKAIGHMQEGFRSTSLALQQIQDVVNKQ<br>SSILTETMASLNKNFGA-----ISSVLQDIYQQLDSIQAD<br>AQ--VDRIIT-----GRLSSLSV-----<br>--               |
| 60 | >UniRef90_A0A7D3XV31_896_975<br>GVTQNVLYENQKLIANQF-----XXXXXXXXXXXXXXXXXXXXXXXXXXXXX<br>XXXXXTLVKQLSSNFGA-----ISSVLNDILSRLDKVEA-<br>-----<br>--                                 |
| 61 | >UniRef90_A4ZCS0_788_870<br>GITQSVLMKNQE KIAASF-----NKAIGHMQEGFKSTSLALQQIQDVVNKQ<br>SAVLSEAMQSLNKNFGA-----ISSVIQDIYQQLDAIQAD<br>AQ-----<br>--                                   |
| 62 | >UniRef90_A0A6M3H873_789_884<br>GITQSVLLENQE KIAASF-----NKAIGHMQEGFRSTSLALQQIQDVVNKQ<br>SAILTETMAALNKNFGA-----ISSVIQDIYQQLDAIQAD<br>AQ--VDRLIT-----GRLSSLS-----<br>--           |

|    |                                                                                                                                                                               |
|----|-------------------------------------------------------------------------------------------------------------------------------------------------------------------------------|
| 63 | >UniRef90_A0A5B8KD01_803_897<br>GITQTLKKKNQELLANSF-----NNALQYMQQGFEATSQALQQIQDVVNQQ<br>AAVLTEVMSSLNKNFGA-----ISSVIQDIYKQLDELSAN<br>AQ--VDRLIT-----GRLSSL-----<br>--           |
| 64 | >UniRef90_A4ZCP1_795_879<br>GITQTVLQKNQEIAASF-----NKAMLHMQDGFRATSSALQQIQDVINKQ<br>GSVLQDAMNALNKNFGA-----VSSVIQDIYSRLDTIEAN<br>VQ--VN-----<br>--                               |
| 65 | >UniRef90_A0A3G6IPR3_787_891<br>GITQTILLKNQETLANSF-----NKAVRHMQEGFSATSQALVQIQDVINQQ<br>SAILSEVMAALNKNFGA-----ISSVIQDIYKQLDALAAN<br>AQ--VDRLIT-----GRLSALSVLASSKQSE-----<br>-- |
| 66 | >UniRef90_D0R1F3_174_278<br>GITQSLLMKNQEIAASF-----NKAIGHMQEGFRSTSLALQQIQDVVNKQ<br>SAILTETMNSLNKNFGA-----ITSFIQDIYAQLDAIQAD<br>AQ--VDRLIT-----GRLSSLSVLASAKQSE-----<br>--      |
| 67 | >UniRef90_A0A0A1G556_790_889<br>GITQSLLMKNQEIAASF-----NKAIGHMQEGFRSTSLALQQVQDVVNKQ<br>SAILTETMAALNKNFGA-----ISSVLQDIYQHLDIAIQAD<br>AQ--ADRLIT-----GRLSSLSVLAA-----<br>--      |
| 68 | >UniRef90_F4MIQ6_787_894<br>GITQTILLKNQEIAASF-----NKAIGHMQEGFKSTSLALQQIQDVVNKQ<br>SAILTETMASLNKNFGA-----ISSVIQEIYQQLDSIQAN<br>AQ--VDRIIT-----GRLSSLSVLASSKQAEYLR-----<br>--   |
| 69 | >UniRef90_A0A4D6FWE9_802_907<br>GITQTLIDNQKMLAESF-----NNAVKYMQQGFEATSSALQQIQDVVNQQ<br>GAVLQEVLSLNKNFGA-----VSSVIQDIYKSLDELSAN<br>AQ--MDRLIT-----GRLSALSVLASSKQADQ-----<br>--  |
| 70 | >UniRef90_A0A346M347_790_872<br>GITQSLLMKNQEIAASF-----NRAIGHMQEGFKSTSLALQQIQDVVNKQ<br>SAILTETMASLNKNFGA-----ISSVLQDIYQQLDAIQAD<br>AQ-----<br>--                               |
| 71 | >UniRef90_A4ZCU4_790_873<br>GITQTVLQKNQEIAASF-----NKAMAHMQNGFRATSSALQQIQDVINKQ<br>GSILQDAMNSLNKNFGA-----VSSIIQDIYSRLDAIEAN<br>VQ--V-----<br>--                                |
| 72 | >UniRef90_G3FER7_786_891<br>GITQSLLMKNQEIAASF-----NKAIGHMQEGFRSTSLALQQVQDVVNKQ<br>SAILTETMNSLNKNFGA-----ISSVIQDIYAQLDVIQAD<br>AQ--VDRLIT-----GRLSSLSVLAFQSEY-----<br>--       |
| 73 | >UniRef90_F6M7B5_786_869<br>GITQTVLQKNQEIAASF-----NKAMAHMQDGFRATSLALQQIQDVLNRQ<br>GSVLQDAMNSLNKNFGA-----ISSVIQDIYSRLDTLEAN<br>TQ--V-----<br>--                                |
| 74 | >UniRef90_B8YDG3_238_333<br>GITQSLLMKNQEIAASF-----NKAMGQMQEGFKSTSLAFQIQDVVNKQ<br>SAILTETMASLNKNFGA-----ISSVIQDIYQQLDSIQAD                                                     |

|    |                                                                                                                                                                            |
|----|----------------------------------------------------------------------------------------------------------------------------------------------------------------------------|
|    | AQ--VDRLIT-----GRLSSL-----<br>--                                                                                                                                           |
| 75 | >UniRef90_A0A7D5AAR2_785_887<br>GITNSLLLNQEKIAASF-----NKAIGHMQEGFKSTSLALQQIQDVVNKQ<br>SSILTETMQSLNKNFGA-----ISSVIQDIYQQLDAIQAD<br>AQ--VDRLIT-----GRLSSLSVLASAKQ-----<br>-- |
| 76 | >UniRef90_Q6R4P5_790_872<br>GITQAVLLKNQEKIAASF-----NKAIGQMQEGFRSTSLALQQIQDVVNKQ<br>SAILTETMASLNKNFGA-----ISSVIQDIYQQLDVIQAD<br>AQ-----<br>--                               |
| 77 | >UniRef90_A0A2K8GIS7_784_867<br>GITQSLLMKNQEKIAASF-----NKAIGHMQEGFRSTSLALQQIQDVVNKQ<br>SAILTETMQSLNKNFGA-----ISSVIQEIYQQLDTIQAN<br>AQ--V-----<br>--                        |
| 78 | >UniRef90_Q98WQ0_251_353<br>GITQTVLQKNQEKIAASF-----NKAMKHMQDGFSAATSLALQQVQDVVNEQ<br>GAILQQTMHSLNKNFGA-----ISHVIQDIYKQLDALEAN<br>AQ--VDRIIT-----GRLSSLSVLASAKQ-----<br>--   |
| 79 | >UniRef90_A0A5B8KH03_798_878<br>GITQTVILKNQELLANSF-----NNALLHMQEGFKATSNALXQIQDVVNQQ<br>AAVXXEVMXSXNKNFGA-----ISSVIQDIYKQLDXLSAX<br>-----<br>--                             |
| 80 | >UniRef90_A0A6M8F2F7_788_884<br>GITNSLLLNQEKIAASF-----NKAIGHMQEGFKSTSLALQQVQDVVNKQ<br>SAILTETMAALNKNFGA-----ISSVIQDIYQQLDAIQAN<br>AQ--VDRLIT-----GRLSSLSV-----<br>--       |
| 81 | >UniRef90_A0A516UWD6_790_886<br>GITNSLLLNQEKIAASF-----NKAIGHMQEGFKSTSLALQQVQDVVNKQ<br>SAILSETMTALNKNFGA-----ISSVIQEIYQQLDAIQAD<br>AQ--VDRIIT-----GRLSSLSV-----<br>--       |
| 82 | >UniRef90_A0A1V0G3A1_783_880<br>GITQSLLLNQEKIAASF-----NKAIGHMQEGFRSTSLALQQVRDVVNKQ<br>SAILAETMAALNKNFGA-----ITSVIQDIYQQLDAIQAD<br>AQ--VDRLIT-----GRLSSLSV-----<br>--       |
| 83 | >UniRef90_G4RJ69_790_873<br>GITQSLLLNQEKIAASF-----NKATGRMQEGFRSTSLALQQIQDVVNKQ<br>SAILIETMASLNKNFGA-----ISSMIQEIYQQLDAIQAN<br>AQ--V-----<br>--                             |
| 84 | >UniRef90_P11223_783_877<br>GITQSLLLNQEKIAASF-----NKAIGHMQEGFRSTSLALQQIQDVVSKQ<br>SAILTETMASLNKNFGA-----ISSVIQEIYQQFDAIQAN<br>AQ--VDRLIT-----GRLSSL-----<br>--             |
| 85 | >UniRef90_A0A515L594_780_873<br>GITQTVLQKNQEKIAASF-----NKAMKNVQEGFSATSLALKQVQDVLNEQ<br>GGILQQTMHSLNKNFGA-----ITHVIQDIYKQLDALEAN<br>AQ--VDRLIT-----GRLSS-----<br>--         |



|    |                                                                                                                                                  |
|----|--------------------------------------------------------------------------------------------------------------------------------------------------|
|    | --                                                                                                                                               |
| 86 | >UniRef90_Q7T833_790_873<br>GITQSLLLKNQEKIAASF-----NKAIVHMQEGFRSTSLALQQIQDVVNKQ<br>SAIPAEALVALNKNFGA-----ISSVMQDIYQQLDIAIQAD<br>AQ--V-----<br>-- |
| 87 | >UniRef90_A0A482K0W7_1001_1086<br>GEALAQLTQQLSSNFQA-----ISSIEDIYLRDLKLAAD<br>AQ--VDRLIS-----GRLAGLNAFVTQ-----<br>--                              |
| 88 | >UniRef90_B6VDY7_764_885<br>GEALSHLTAQLSNNFQA-----ISTSIQDIYNRLEEVEAN<br>QQ--VDRLIT-----GRLSALNAYVTQLLNQMSQIRQ-----<br>--                         |
| 89 | >UniRef90_T1SQV2_1076_1185<br>GEALSQLTSQQLQKNFQA-----ISSIAEIYNRLEKVEAD<br>AQ--VDRLIT-----GRLAALNAYV-----<br>--                                   |
| 90 | >UniRef90_A0A0F6YS09_784_879<br>SEILNKLMAQLNVNFGA-----ISSSLDIYSQLDELNAN<br>AQ-----<br>--                                                         |
| 91 | >UniRef90_H9MGG6_40_148<br>GEALSQLTSQQLQKNFQA-----ISSIAEIYNKLEKVEAD<br>AH--VDRLIT-----GRLAALNAY-----<br>--                                       |
| 92 | >UniRef90_A0A6B9KDI7_980_1090<br>GSALNQLTVQLQNNFQA-----ISSINDIYSRLDQITAD<br>AQ--VDRLIT-----GRLSALNAFVAQ-----<br>--                               |
| 93 | >UniRef90_B8YDG2_238_321<br>GIPQSFLIKNQKKIAAPF-----NKPMGHPQVDYRSTSLALQQIQDVVNKQ<br>SAILTETMPSLNKNLGA-----ISSVIQDIYQQLDIAIQAN<br>AQ--V-----<br>-- |
| 94 | >UniRef90_A0A482JX42_991_1074<br>GQALSQLTRQLASNFQA-----ISSIEDIYNRLDSLAAD<br>AQ--VDRLIT-----GRLGALNAF-----<br>--                                  |
| 95 | >UniRef90_Q09PH3_1074_1185<br>GEALSQLTSQQLQKNFQA-----ISSIAEIYNRLEKVEAD<br>AH--VDRLIT-----GRLAALNAYVAQ-----<br>--                                 |
| 96 | >UniRef90_F1DB20_970_1079<br>GQALHQLTKQLSMNFQA-----ISSIEDIYMRLDALAAD<br>AQ--VDRLIN-----GRLAALNAFV-----<br>--                                     |
| 97 | >UniRef90_A0A1B0YTV9_86_177<br>GKALSELTKQLAQNFDA-----ISYSIEDIYNRLDKLAAD<br>AQ--VDRLIT-----GRLAALNAFVTQQLTRFTE-----<br>--                         |
| 98 | >UniRef90_H9MGD2_41_134<br>GEALSQLTSQQLQKNFQA-----ISSIAEIYNRLERVEAD<br>AQ-----<br>--                                                             |

|     |                                                                                                                                                 |
|-----|-------------------------------------------------------------------------------------------------------------------------------------------------|
| 99  | >UniRef90_B6VDX8_803_924<br>GSALNHLTLQLQNNFDA-----ISHSIADIYARLDEVEAN<br>QQ--VDRLIT-----GRLAALNAYVTQVLTQISQLKAQ-----<br>--                       |
| 100 | >UniRef90_A0A0K2BM62_1088_1199<br>GNALSQLTQQLQNNFQA-----ISSIAEIYNRLEKVEAD<br>AQ--VDRLIT-----GRLAALNAYVAQ-----<br>--                             |
| 101 | >UniRef90_B1PHK2_990_1099<br>GQALHQLTKQLASNFQA-----ISASIEDIYNRLDGLAAD<br>AN--VDRLIT-----GRLAALNAFVT-----<br>--                                  |
| 102 | >UniRef90_A0A4Y5QS01_798_891<br>SDILNKLMAQLSVNFGA-----VSSSLNEIYKLDQLSAD<br>-----<br>--                                                          |
| 103 | >UniRef90_A0A0N6W222_796_891<br>SDILNKL MVQLSVNFGA-----VSSSLNEIYKLDQLNAD<br>AQ-----<br>--                                                       |
| 104 | >UniRef90_A4ULL1_984_1095<br>GQALSQLTRQLASNFQA-----ISSIQDIYNRLNGLEAD<br>AQ--VDRLIT-----GRLAALNAFVTQ-----<br>--                                  |
| 105 | >UniRef90_A0A7D5Q3B7_809_936<br>GQAISTLTAQLSQNFQA-----ISASIADIYNRLNTLEAD<br>AQ--VDRLIT-----GRLAALNAFVTQTL SKLA EVRQA-----RQLAK-<br>--           |
| 106 | >UniRef90_K4JZ69_984_1073<br>GEALSQLTKQLASNFQA-----ISSIEDIYNRLDMIAAD<br>AQ--VDRLIT-----GRIGALNAFVTQ-----<br>--                                  |
| 107 | >UniRef90_A0A0C5CJL1_1073_1183<br>GDALSQLTSQLQNNFQA-----ISSIAEIYNRLEKVEAD<br>AQ--VDRLIT-----GRLAALNAYVS-----<br>--                              |
| 108 | >UniRef90_A0A482JZK4_993_1076<br>GQALSQLTRQLASNFQA-----ISNSIEDIYNRLDGLTAD<br>AQ--VDRLIT-----GRIGALNAFVA-----<br>--                              |
| 109 | >UniRef90_A0A6B9KDF5_753_833<br>GVVQNALVDDVSKIANGF-----NQLTASVGKLAATTSSALQAIQAVVNQN<br>AAQVEALVSGISENFGA-----ISTNFRVISQR LDKLEAD<br>-----<br>-- |
| 110 | >UniRef90_A0A1W5YKT3_1031_1114<br>GMALSQLTKQLASNFQA-----ISSIEDLYNRLDRVEAD<br>QQ--VDRLIT-----GRLAALNAFVA-----<br>--                              |
| 111 | >UniRef90_E3W5H9_1074_1183<br>GESLSQLTSQLQKNFQA-----ISSIAEIYNRLGKVEAD<br>AQ--VDRLIT-----GRLAALNAYV-----<br>--                                   |
| 112 | >UniRef90_F1DAY3_987_1098<br>SDALNHLTKQLQHNFQT-----ISNSISDIYGR L NQLEAD<br>AQ--VDRIIV-----GRIAALNAFVSQ-----<br>--                               |

|     |                                                                                                                                                 |
|-----|-------------------------------------------------------------------------------------------------------------------------------------------------|
| 113 | >UniRef90_H9MGD4_58_142<br>GEALSQLTSQKQNFQA-----ISSIAEIYNRLEKVEAD<br>VQ--VDRLIT-----GRLAALNAHVS-----<br>--                                      |
| 114 | >UniRef90_A0A1L2KGB2_982_1089<br>GQALSHLTKQLQNNFQA-----ISSIEDIYNRLDSLAAAD<br>AQ--VDRLIT-----GRLAALNSF-----<br>--                                |
| 115 | >UniRef90_A0A0K2SF41_1044_1154<br>GKALNQLTAQLQNNFQA-----VSSSIADIYYRLDELQAD<br>AQ--VDRLIT-----GRLAALNAFVTQT-----<br>--                           |
| 116 | >UniRef90_F1DAX6_996_1087<br>GHALSQLTRQLASNFQA-----ISSIQDIYNRLEGLEAD<br>AQ--VDRLIT-----GRLAALNAFVTQ-----<br>--                                  |
| 117 | >UniRef90_A0A172AZS6_1067_1151<br>GKALNHLTAQLQNNFQA-----ISSIEDIYYKLDEVNAD<br>AQ--VDRLIT-----GRLASLNAFVT-----<br>--                              |
| 118 | >UniRef90_B2BW33_1066_1154<br>SQALTKLLGQLNYNFGA-----TTSSIKELYERLAKLEAD<br>VQ-----<br>--                                                         |
| 119 | >UniRef90_P10033_1058_1184<br>GQALSHLTVQLQNNFQA-----ISSISDIYNRLDELSAD<br>AQ--VDRLIT-----GRLTALNAFVSQTLTRQAEVRAS-----RQLAK-<br>--                |
| 120 | >UniRef90_A0A1L2KGD0_1014_1098<br>GAALSQLTRQLASNFQA-----ISASLTDIYNRLDGLAAD<br>AQ--ADRLIN-----GRLAALNAFVT-----<br>--                             |
| 121 | >UniRef90_F1DB14_1021_1103<br>GTALSQLTKQLASNFQA-----ISSIEDLYNRLGAVEAD<br>QQ--VDRLIT-----GRLAALNAFVA-----<br>--                                  |
| 122 | >UniRef90_A0A0U1WHD7_997_1105<br>GLALSQLTKQLASNFQA-----ISSIEDLYNRLDRVEAD<br>LQ--VDRLIT-----GRLAALNAFV-----<br>--                                |
| 123 | >UniRef90_A0A7D5Q9G3_807_934<br>GQALSSLTSQLSHNFQA-----ISASIADIYNRLNELDAD<br>AQ--VDRLIT-----GRLAALNAFVTQTLTKLAQAEVRQA-----RQLAK-<br>--           |
| 124 | >UniRef90_A0A1L7HJ82_772_853<br>GVMQDALVEDVNKLANGF-----NNLTQYVSDGFKTTSQALSTIQAVVNNN<br>AQQVSQLVQGLSENFGA-----ISNNFALIAERLERIEAA<br>M-----<br>-- |
| 125 | >UniRef90_D9J1Z4_1062_1167<br>GKALNHLTLQLQNNFQA-----ISSIQDIYYKLDDINAD<br>AQ--VDRLIT-----GRLAALNAFVTQTLTRQAEVRAS-----RQLAK-<br>--                |
| 126 | >UniRef90_H9BR25_838_922<br>TTALNQLTQQLANNFQA-----ISSITDIYNRLGQLEAD<br>AQ--VDRLIT-----GRLAALNAFVS-----<br>--                                    |

|     |                                                                                                                                                 |
|-----|-------------------------------------------------------------------------------------------------------------------------------------------------|
| 127 | >UniRef90_A0A286R3Q7_980_1088<br>GNALNHLTMQLRNNFQA-----ISSIDDIYGRLELAAD<br>AQ--VDRLIN-----GRLAALNAFV-----<br>--                                 |
| 128 | >UniRef90_E6YDV6_791_886<br>SDILNKLMAQLNVNFGA-----ISSSLQDIYAQLGDLSAN<br>AQ-----<br>--                                                           |
| 129 | >UniRef90_S5YNL4_1002_1084<br>GMALNHLTLQLQNNFQA-----ISSIADIYRRLDQLTAD<br>AQ--VDRLIN-----GRLAALNAFVS-----<br>--                                  |
| 130 | >UniRef90_A0A1L2KGF1_976_1085<br>GNALNHLTSQLRQNFQA-----ISSSIQAIYDRLDTIQAD<br>QQ--VDRLIT-----GRLAALNAFVA-----<br>--                              |
| 131 | >UniRef90_A0A6B9KIG7_969_1078<br>GQALAQLTRQLASNFQA-----ISSSIEDIYNRLDILAAD<br>AQ--VDRLIS-----GRLSALNAFVTQ-----<br>--                             |
| 132 | >UniRef90_A8JNZ2_762_843<br>GVVQNALVDDVKNLANGF-----NQLTASVGKLALTTSSALQAIQAVVNQN<br>AAQVESLVSGITENFGA-----ISTNFKVISQRLDKLEAD<br>V-----<br>--     |
| 133 | >UniRef90_U4DCU7_800_893<br>SDILNKLMAXLSVNFGA-----VSSSLNEIYKLDQLNAD<br>-----<br>--                                                              |
| 134 | >UniRef90_A0A1L2KGD3_986_1095<br>GLALSHLTKQLKNNFQA-----ISSIDDIYNRLDELAAN<br>AQ--VDRLIT-----GRLSALNSFVA-----<br>--                               |
| 135 | >UniRef90_H9BR08_826_938<br>GHALATLTQQLANNFQA-----ISASISDIYNRLNQLEAD<br>AQ--VDRLIT-----GRLASLNAFVTQTL-----<br>--                                |
| 136 | >UniRef90_A0A222UC54_1077_1168<br>GKAINQLTAQLQNNFQA-----ISSSIEDIYYRLDEVNAD<br>AQ--VDRLIT-----GRLAALNAFVTQ-----<br>--                            |
| 137 | >UniRef90_B1PHI8_987_1096<br>GTALSQTLTKQLASNFQA-----VSSSIEDLYNRLDRLEAD<br>QQ--VDRLIT-----GRLAALNAFVT-----<br>--                                 |
| 138 | >UniRef90_A0A166ZLY7_973_1064<br>GNALSHLTSQLQNNFQA-----ISASINDIYSRLDQLSAD<br>AQ-----<br>--                                                      |
| 139 | >UniRef90_A0A481S1E3_162_242<br>GVMQDALVNDVNKLANGF-----NNLTQFVADGFKTTSEALSAIQSAVNSN<br>AYQVSQVLVQGLSDNFGA-----ISNNFALILERLERIEAA<br>-----<br>-- |
| 140 | >UniRef90_A0A220YLM0_1001_1084<br>GMALNHLTLQLQHNFQA-----ISSIADIYRRLDQLTAD<br>AQ--VDRLIN-----GRLAALNAFV-----<br>--                               |

|     |                                                                                                                                                |
|-----|------------------------------------------------------------------------------------------------------------------------------------------------|
| 141 | >UniRef90_F6KIE7_60_143<br>GMALTQLTEQLQNNFQA-----ISSSIQTIYNRLDELSAD<br>AQ--VDRLIT-----GRLASLNAFVAQ-----<br>--                                  |
| 142 | >UniRef90_A0A0M4HA36_990_1105<br>GAALTQLTVQLQHNFQA-----ISSSIDDIYSRLDILSAD<br>VQ--VDRLIT-----GRLSALNAFVAQILTKY-----<br>--                       |
| 143 | >UniRef90_A0A5J6DE25_995_1079<br>GLALSHLTKQLQNNFQA-----ISSSISDIYARLDQLTAD<br>AQ--VDRLIT-----GRLAALNAFV-----<br>--                              |
| 144 | >UniRef90_A0A1X9JJW0_765_844<br>GVMQDALVNDVNKLANGF-----NNLTQYVADGFKTTSQALSAIQSVVNNN<br>AQQISQLVQGLSENFQA-----ISNNFLVIAERLERLEA-<br>-----<br>-- |
| 145 | >UniRef90_A0A2U9I6C2_859_939<br>GMALTQLTNQLSYNFQA-----ISSSISDIYQRLTQLEAD<br>VQ--VDRLIT-----GRLAALNS-----<br>--                                 |
| 146 | >UniRef90_K4KCP3_965_1075<br>GQAIAHLTQQLTQNFQA-----ISHSIADIYNRLDELAAD<br>AQ--TDRLIT-----GRLSALNAFVTQ-----<br>--                                |
| 147 | >UniRef90_Q6Q1S2_966_1078<br>GSALNHLTSQLRHNFQA-----ISNSIQAIYDRLDSIQAD<br>QQ--VDRLIT-----GRLAALNAFVSQVL-----<br>--                              |
| 148 | >UniRef90_Q0Q4F4_968_1076<br>GLALSHLTNQLQNNFQA-----ISSSISDIYARLDQLTAD<br>AQ--VDRLIT-----GRLSALNAFVS-----<br>--                                 |
| 149 | >UniRef90_A0A6B9KDC2_1013_1097<br>GTALSQTLTKQLASNFA-----ISSSIEDLYNRLDTLEAD<br>QQ--VDRLIT-----GRLAALNAFVT-----<br>--                            |
| 150 | >UniRef90_D3XGI6_1080_1169<br>GKALNYLTAQLQNNFQA-----ISSSIEDIYHRLDEVNAD<br>VQ--VDRLIT-----GRLAALNAFV-----<br>--                                 |

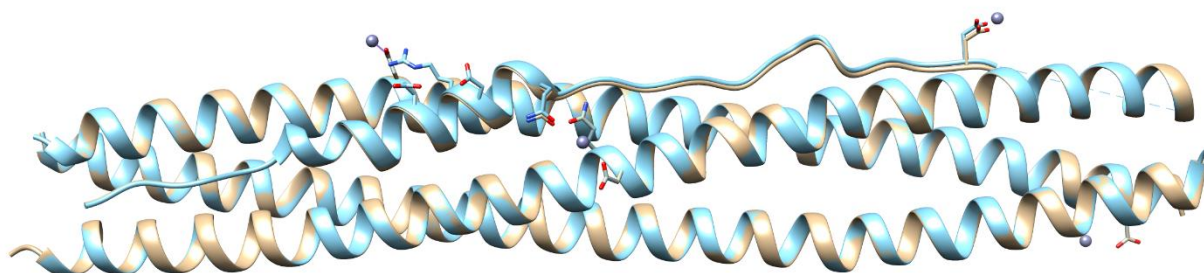

**Supplementary Figure S1.** Docked HR2 domain to SARS-CoV-2 HR1 domain (tan ribbon) aligned to 6LXT crystal structure of SARS-CoV-2 HR1/HR2 complex (blue ribbon).

| <b>Supplementary Table S3.</b> Docking scores and sequences for HR2, EK1, and designed peptide inhibitors. |                            |                                          |
|------------------------------------------------------------------------------------------------------------|----------------------------|------------------------------------------|
| <b>Peptide</b>                                                                                             | <b>HDOCK docking score</b> | <b>Sequence</b>                          |
| HR2 peptide                                                                                                | -756.39                    | DVDLGDISGINASVVNIQKEIDRLNEVAKNLNESLIDLQE |
| 132D                                                                                                       | -702.46                    | WFLYLWLREMMKKMWORMREGMMETWWWEWE          |
| 132C                                                                                                       | -698.67                    | WILYLWLREMMKKMWORMREGMMETWWWEWE          |
| 132B                                                                                                       | -693.35                    | WMLYLWLREMMKKMWORMREGMMETWWWEWE          |
| 130A_2                                                                                                     | -693.34                    | WVLYLWLREMMKRMWQRREGMMETWWWEWE           |
| 130A_4                                                                                                     | -684.38                    | WVLYMWLREMMKRMWQRREGMMETWWWEWE           |
| 130A                                                                                                       | -679.61                    | WVLYVWLREMMKRMWQRREGMMETWWWEWE           |
| 132-SDS                                                                                                    | -679.54                    | WRLYWVLREMMWKMWORMREGMMETWWWEWE          |
| 130A_3                                                                                                     | -678.43                    | WVLYIWLREMMKRMWQRREGMMETWWWEWE           |
| 137B                                                                                                       | -670.31                    | WVLYVWLREMMKKMWORMWKGMWETWWWEWE          |
| 137A                                                                                                       | -669.48                    | WVLYVWLREMMKKMWORMWEGMWETWWWEWE          |
| 135B                                                                                                       | -668.91                    | WVLYVWLREMMWKMWORMWKGMETWWWEWE           |
| 135A                                                                                                       | -668.8                     | WVLYVWLREMMWKMWORMWEGMMETWWWEWE          |
| 138B                                                                                                       | -663.36                    | WVLYVELREMMKKMWORMRKGM M ETWWWEKE        |
| 138A                                                                                                       | -662.95                    | WVLYVELREMMKKMWORMREGMMETWWWEKE          |
| 130C                                                                                                       | -662.75                    | WVLYVWLREMMKRMWQVREGMMETWWWEWE           |
| 130B                                                                                                       | -661.42                    | WVLYVWLREMMKRMWQAREGMMETWWWEWE           |
| 136-SDS                                                                                                    | -659.28                    | WRLYWVLREMMWKMMRMMEGMMETWWWEWE           |
| 128A                                                                                                       | -653.6                     | QLYFVWLREMMKRMWQVREGMMETWWWEWE           |
| 126A                                                                                                       | -637.41                    | QLYFVWLREMMKRMWQVREGMEETWWMWQE           |
| 129A                                                                                                       | -635.22                    | QIYFVELWEMIKRMWQVREGMMETWWWEWE           |
| 134A                                                                                                       | -629.33                    | WVLYVWLREMMKKMIRMMEGMEGETLWWWEWE         |
| 134B                                                                                                       | -629.23                    | WVLYVWLREMMKKMIRMMEGMEGETLWWWEWE         |
| 131A                                                                                                       | -625.27                    | WVLYVEVREMMKRMWQVREGMMETWWWEWE           |
| 134C                                                                                                       | -621.47                    | WVLYVWLREMMKKMIRMMEGMEGVTLWWWEWE         |

|                                        |               |                                 |
|----------------------------------------|---------------|---------------------------------|
| 125-SDS                                | -620          | QLYFLWLREMKWRMWQRREGMEETWIWFVE  |
| 133B                                   | -608.49       | WVLYVWLREMMKKKKKRQKGEMETWWWWEWE |
| 130A_1                                 | -608.13       | WVLYFWLREMMKRMWQRREGMMETWWWWEWE |
| 133C                                   | -603.3        | WVLYVWLREMMKKKKKRQKGEMETWWWWEWE |
| 133A                                   | -600.76       | WVLYVWLREMMKKKKKRQEGEMVTWWWWEWE |
| 124-SDS                                | -600.42       | QLWFIWLREEKWKMWQKREGLEESYIWFVE  |
| 123-redo-SDS                           | -599.22       | QLWWVDLREEKWKMWQKREDLEESYIWFVE  |
| 121-SDS                                | -536.69       | QLTWVDLREEKWKMWQAIKDLEESYIWFVE  |
| 127-SDS                                | -535.54       | QLYFWWLREMMWRMWQRREGMMETWWMWQE  |
| 122-redo-SDS                           | -520.64       | QLTWVDLREEKWKMWQKIEDLEESYIWFVE  |
| 120-SDS                                | -511.86       | QLTFLDLREEKKKLEQAIKDLEESYIWFVE  |
| 119                                    | -495.23       | QLTFLDLEEEKKKLEQAIKDLEESYIWFVE  |
| 118                                    | -468.44       | QLTFLDLEEEKKKLEQAIKDLEESYIDLKE  |
| SNF-M006                               | -466.13       | NVTFLDLEYEMKKLERAIKKLEESYIDLKE  |
| CLC-M008                               | -461.36       | NVTFLDLEYEMKKLERAIKKLEENYIDLKE  |
| MEM-M019                               | -461.36       | NVTYLDLEYEMKKLKAIAKKLIESYIILKE  |
| SNF-M007                               | -458.72       | NVTFLDLEYEMKKLEEAIAKKLEENYIDLKE |
| KJK-M012                               | -457.05       | NVTYLDLEYIMKKLEEAIKDLRESYIDLKE  |
| MEM-M023                               | -456.92       | NVTFLDLEYEMKKLKAIAKKLIESYIILKE  |
| SVS-W1M2                               | -456.52       | WMTFLDLEYEMKKLEEAIAKKLEESYIDLKE |
| MEM-M016                               | -454.59       | NVTYLDLEYEMKKLEEAIAKKLEESYIDLKE |
| SVS-W1I2                               | -453.78       | WITFLDLEYEMKKLEEAIAKKLEESYIDLKE |
| MEM-M018                               | -453.26       | NVTYLDLEYEMKKLEEAIKDLEESYIDLKE  |
| SGS-M004                               | -452.92       | NVTFLDLEYEMKKLERAIAKKLEESYIDLKE |
| MAM-M001                               | -452.92       | NVTFLDLEYEMKKLERAIAKKLEESYIDLKE |
| MEM-M017                               | -452.39       | NVTYLDLEYEMKKLEEAIAKKLHESYIDLKE |
| MAM-M002                               | -451.63       | NVTFLKLEYEMKKLERAIAKKLEESYIDLKE |
| CLC-M010                               | -451.62       | NVTFLDLKYEMKKLEEAIAKKLEESYIDLKE |
| SVS-W1                                 | -451.00       | WVTFLDLEYEMKKLEEAIAKKLEESYIDLKE |
| KJK-M001, SGS-M002                     | -450.83       | NVTFLDLEYEMKKLEEAIAKKLRESYIDLKE |
| KJK-M006                               | -450.75       | NVTFLDLEYEMMKLEEAIAKKLEESYIDLKE |
| MAM-M003                               | -450.3        | NVTFLKLEYEMKKLEEAIAKKLEESYIDLKE |
| MEM-M011, KJK-M003, SGS-M001, LDM-M002 | -449.7        | NVTFLDLEYEMKKLEEAIAKDLEESYIDLKE |
| <b>EK1</b>                             | <b>-449.7</b> | NVTFLDLEYEMKKLEEAIAKKLEESYIDLKE |
| MEM-M014, KJK-M002                     | -449.69       | NVTFLDLEYEMKKLEEAIAKKLHESYIDLKE |
| MEM-M015                               | -448.53       | NVTFLDLEYEMKKLEEAIAKDLHESYIDLKE |
| SVS-W1-I2L3Y4W6                        | -444.41       | WILYLWLEYEMKKLEEAIAKKLEESYIDLKE |
| SVS-W1I2L3Y4                           | -443.17       | WILYLDLEYEMKKLEEAIAKKLEESYIDLKE |
| LDM-M003                               | -441.51       | NVTFLDLEYEMKKLEEAIAKKLEESYIDDKE |
| MEM-M013                               | -440.69       | NVTFLDLEYEMKKLEEAQKKLEESYIDLKE  |
| SVS-W1I2L3Y4M5                         | -438.54       | WILYMDLEYEMKKLEEAIAKKLEESYIDLKE |

|            |         |                                |
|------------|---------|--------------------------------|
| MEM-M009   | -438.16 | NVTFLDLEYEMKKLEEAIKKLEESYIDLKF |
| SVS-W1I2L3 | -437.84 | WILFLDLEYEMKKLEEAIKKLEESYIDLKE |
| SGS-M003   | -431.15 | NVTFLDLEYEMKKLEEAIKELEESYIDLKE |
| LDM-M001   | -431.01 | NVTFLDLEYEEKKLEEAIKKLEESYIDLKE |
| KJK-M004   | -430.67 | NVTFLDLEYEMKKLEEAIKELEESYIDLKE |
| MEM-M012   | -428.52 | NVTFLDLEYEMKKLEEAEKKLEESYIDLKE |
| MEM-M010   | -424.73 | NVTFLDLEYEMKKLEEAIKKLEESYFDLKE |
| KJK-M005   | -412.24 | NVTFLDLEYEMKKKEEAIKKLEESYIDLKE |
| 108        | -403.77 | NVKFLDLRYEKKRLERKKKKLEESYIDLRE |
| 117        | -365.94 | NVTFVDIEYELKKIEEALKKVEELYFDLKE |
| 113        | -347.78 | NVKFVDIRYELKRIERKKKKVEELYFDLRE |
| 115        | -337.28 | NVKFVDIRYELKRIERKLKKVEELYFDLRE |
| 114        | -327.78 | NVKFVDIRYEKKRIERKLKKVEELYFDLRE |
| 105        | -309.75 | NETEVDIEEELKKIEEALKEVEEDYFDEKD |
| 104        | -294.61 | NETEVDIEEELKKIEEALKEVEELYFDEKD |
| 107        | -266.32 | NETEVDIEEELKKIEEALKEEEEYFDEKD  |
| 110        | -259.59 | NETEVDDEEELKKIEEALKEVEEDYFDEKD |
| 106        | -255.06 | NETEVDIEEELKKIEEALKEEEEDYFDEKD |
| 102        | -245.98 | NETEVDDEEELKKIEEALKEEEEDYFDEKD |
| 103        | -245    | NETELDDEEEMKKLEEAIKEEEESYIDEKD |
| 109        | -216.34 | NETEVDDEEELKKIEEALKEEEEYFDEKD  |
| 101        | -196.62 | NEKELDDREEKKRLERKKKKEEEDYIDERD |



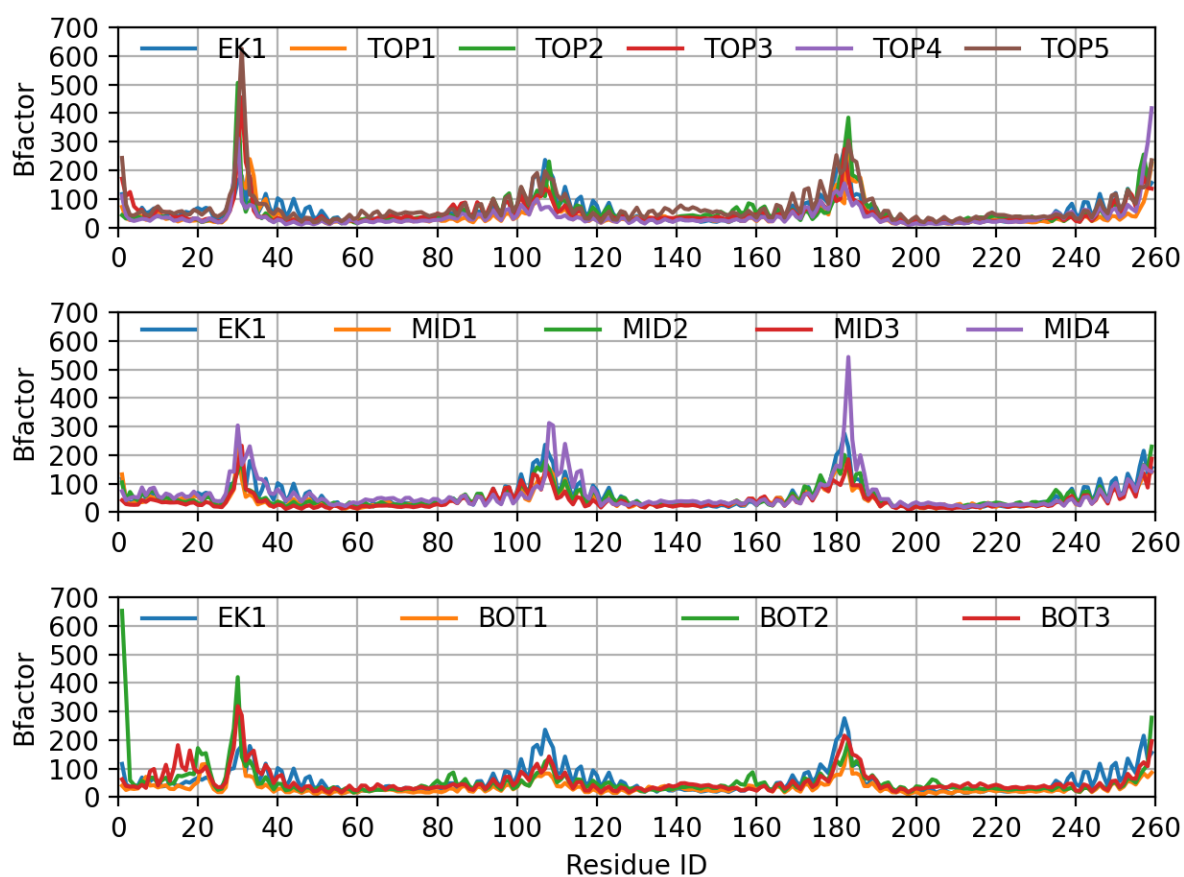

**Supplementary Figure S2.** MD simulation resulted B-factors for top5, middle 4, and bottom 3 peptide candidates and EK1. Residues 1-30 are from the peptides and 31-259 are from the HR1 domain.

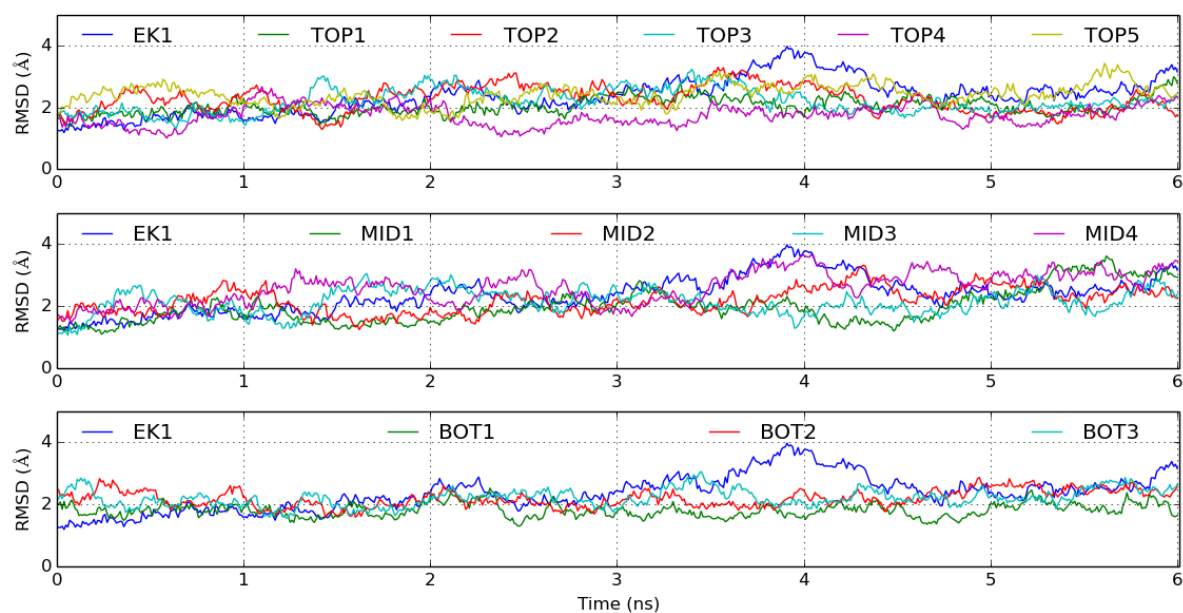

**Supplementary Figure S3.** RMSD result of the MD simulation.

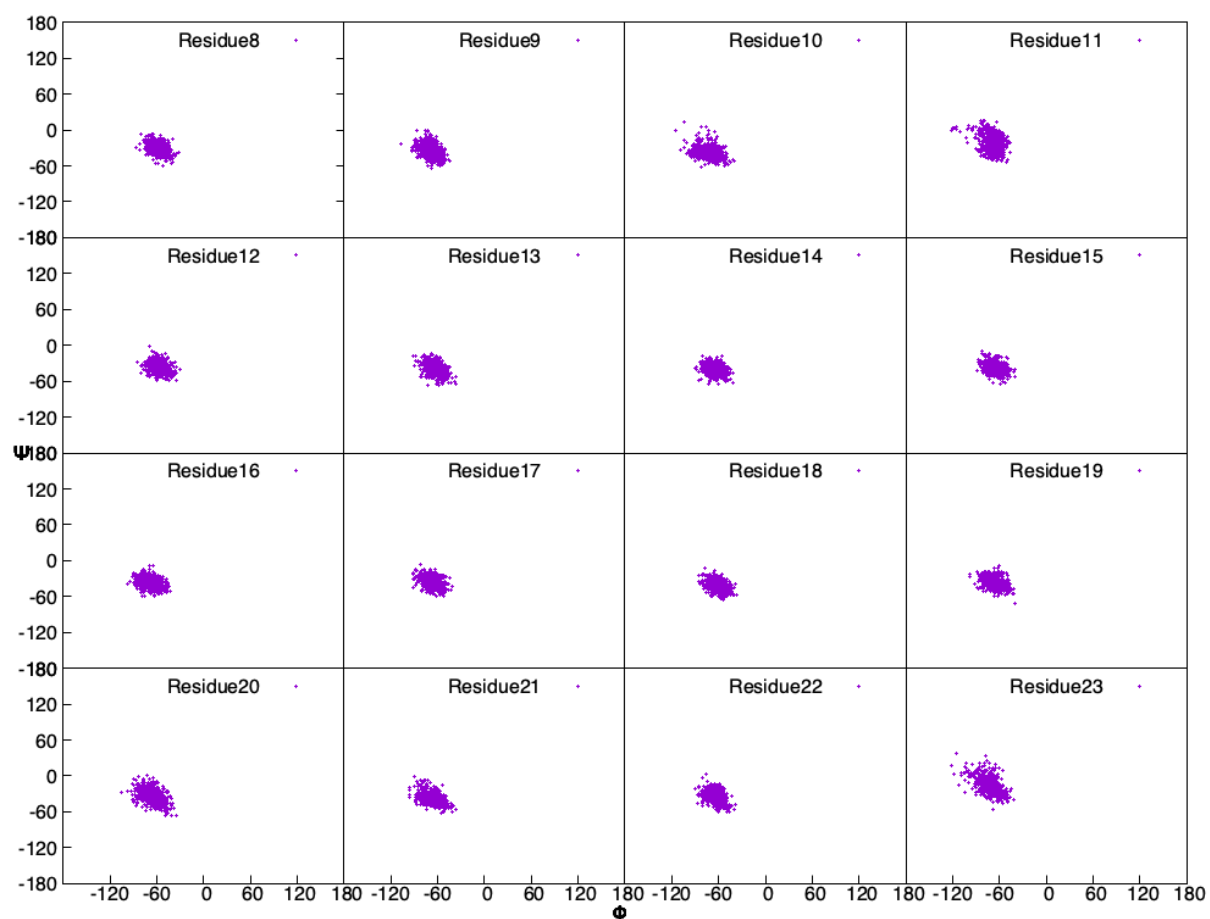

**Supplementary Figure S4.** Example Ramachandran plot of the 132B peptide, indicating these residues are all in the helical form.
